# Supplementary material for: Prevalence and risk of Down syndrome in monozygotic and dizygotic multiple pregnancies in Europe: implications for prenatal screening
Source: PubMed Central journal article supplement — BJOG. 2014 Feb 4;121(7):809–20. doi: 10.1111/1471-0528.12574 (PMC4234000; doi:10.1111/1471-0528.12574), 2014-02-04
Supplement: bjo0121-0809-SD1.pdf [file bjo0121-0809-SD1.pdf]

**Table S1.** Prevalence of Down Syndrome cases per 10,000 multiple and singleton births (95% confidence intervals) over time in England and Wales [Data displayed in Figure 3]

| <b>Year of maternal age</b> | <b>Singleton pregnancies 1990-99</b> | <b>Singleton pregnancies 2000-2009</b> | <b>Multiple pregnancies 1990-1999</b> | <b>Multiple pregnancies 2000-2009</b> |
|-----------------------------|--------------------------------------|----------------------------------------|---------------------------------------|---------------------------------------|
| 35                          | 32.9<br>(30.5 - 35.5)                | 29.4<br>(27.5 - 31.5)                  | 29.0<br>(19.4 - 43.3)                 | 26.9<br>(19.2 - 37.7)                 |
| 36                          | 45.0<br>(41.8 - 48.4)                | 36.8<br>(34.5 - 39.3)                  | 30.3<br>(19.5 - 47.1)                 | 27.0<br>(18.8 - 38.6)                 |
| 37                          | 58.9<br>(54.7 - 63.4)                | 54.2<br>(51.0 - 57.6)                  | 24.3<br>(14.1 - 41.8)                 | 26.2<br>(17.5 - 39.1)                 |
| 38                          | 75.6<br>(70.1 - 81.5)                | 69.3<br>(65.2 - 73.6)                  | 50.0<br>(31.9 - 78.5)                 | 39.4<br>(27.1 - 57.2)                 |
| 39                          | 107<br>(99.8 - 116)                  | 99.6<br>(93.9 - 105)                   | 73.1<br>(47.0 - 114)                  | 65.1<br>(46.5 - 91.3)                 |
| 40                          | 146<br>(135 - 157)                   | 124<br>(117 - 132)                     | 115<br>(73.0 - 180)                   | 55.9<br>(36.4 - 85.9)                 |
| 41                          | 180<br>(165 - 196)                   | 160<br>(149 - 171)                     | 141<br>(83.3 - 238)                   | 57.6<br>(33.4 - 99.5)                 |
| 42                          | 244<br>(221 - 267)                   | 208<br>(193 - 224)                     | 200<br>(107 - 373)                    | 87.9<br>(49.8 - 155)                  |
| 43                          | 297<br>(266 - 333)                   | 243<br>(221 - 266)                     | 93.6<br>(28.9 - 303)                  | 11.9<br>(1.67 - 84.3)                 |
| 44                          | 317<br>(273 - 368)                   | 311<br>(278 - 348)                     | 118<br>(29.6 - 473)                   | 71.0<br>(27.0 - 189)                  |
| 45+                         | 361<br>(313 - 417)                   | 310<br>(277 - 348)                     | 0<br>. . .                            | 6.59<br>(0.93 - 46.8)                 |
